# Supplementary material
Source: Springer Nature journal article supplement (https://www.springermedizin.de/resource/supplementary/13000_2013_1092_MOESM9_ESM.pdf/9625726)
Supplement: MOESM9 [file 9625726]

220                      230                      240                      250                      260  
G T T A T G A A A A G A A A G C T T T C C C C A C T A T A G C T G G A G T A A T A A A

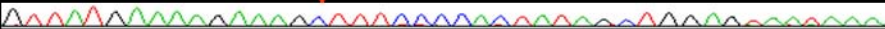

tacat**tgaccaccttttattactcca**gctatagtgggggaaaactttccttt  
tcataactagctaattgtttttaaaaagtattccttttagtttgattgctgca  
tatttcagatatttctttccttaactaaagtactcag**ATATTTATCCAAA**  
**CATTATTGCTATGGGATTCCTGCAGAAAGACTTGAAGGCGTATACAGGA**  
**ACAATATTGATGATGTAGTAAG**gtaagaatgctttgattttctatttcaa  
atattgatgtttatattcatgttgtgttttcatttagaaaagatttct**taa**
